# Supplementary material
Source: Springer Nature journal article supplement (https://www.springermedizin.de/resource/supplementary/12913_2011_1747_MOESM1_ESM.pdf/9528908)
Supplement: MOESM1 [file 9528908]

CR patients consenting to participate at CR intake (8 CR sites, n = 583)

Ineligible (n = 149)  
Reasons: duplicate PCPs (n = 112), PCP cannot be not found on CPSO (n = 11), PCP name was not given by CR enrollee (n = 12) could not make contact (n=4), closed practice (n = 2), and other (n = 8)

144/434 eligible PCPs consenting to participate (33.2% response rate)

68/90 transition records sent by CR received by PCP (75.6%)  
68/143 PCP's received transition record overall (47.6%)

54 PCPs did not consent to interview

90/144 (62.5%) PCPs consented to participate in interview  
66/90 (73.3%) interviews conducted  
28/66 (42.4%) Interviewed PCPs received an intake transition record from 1 of 8 CR sites
